# Supplementary material
Source: publisher figshare collection journal article supplement (https://acs.figshare.com/ndownloader/files/10064293)
Supplement: Supplementary file 1 [file 10064293]

# Supplementary Information

## **Installing Guest Molecules at Specific Sites Within Scaffold Protein Crystals**

Thaddaus R. Huber, Eli C. McPherson, Carolyn E. Keating, Christopher D. Snow

Chemical and Biological Engineering

Colorado State University

1301 Campus Delivery, Fort Collins, Colorado 80523, USA

E-mail: [Christopher.Snow@colostate.edu](mailto:Christopher.Snow@colostate.edu)

MKEYTLDKAHTDVGFKIKHLQISNVKGNFKDYSVIDFDPASAEFKKLDVTIKIASVNTENQTRN  
HLQQDDFFKAKKYPDMTFTMKKYEKIDNEKGKMTGTTLTIAGVSKDIVLDAEIGGVAKGKDGKEI  
GFSLNGKIKRSDFKFATSTSTITLSDDINLNIEVKANEKEGGSHHHHHH

**Figure S1.** Amino acid sequence for CJ without cysteine mutation. The leader peptide on the native putative periplasmic polyisoprenoid-binding protein from *Campylobacter jejuni* was deleted to ease expression and purification.

**G34C**

MKEYTLDKAHTDVCFKIKHLQISNVKGNFKDYSVIDFDPASAEFKKLDVTIKIASVNTENQTRD  
NHLQQDDFFKAKKYPDMTFTMKKYEKIDNEKGKMTGTLTIAGVSKDIVLDAEIGGVAKGKDGKE  
KIGFSLNGKIKRSDFKFATSTSTITLSDDINLNIEVKANEKEGGSHHHHHH

**Figure S2.** Amino acid sequence for CJ-G34C.

**N48C**

MKEYTLDKAHTDVGFKIKHLQISNVKGCFKDYSAVIDFDPASAEFKKLDVTIKIASVNTENQTRD  
NHLQQDDFFKAKKYPDMTFTMKKYEKIDNEKGKMTGTLTIAGVSKDIVLDAEIGGVAKGKDGKE  
KIGFSLNGKIKRSDFKFATSTSTITLSDDINLNIEVKANEKEGGSHHHHHH

**Figure S3.** Amino acid sequence for CJ-N48C.

MKEYTLDKAHTDVGFKIKHLQISNVKGNFKDYSVIDFDPASAEFKKLDVTIKIASVNTENQTRD  
NHLQQDDFFKAKKYPDMTFTMKKYEKIDNEKGKMTGTLTIAGVSKDIVLDAEIGGVAKGKDGKE  
**N182C**  
KIGFSLNGKIKRSDFKFATSTSTITLSDDINLCIEVKANEKEGGSHHHHHH

**Figure S4.** Amino acid sequence for CJ-N182C.

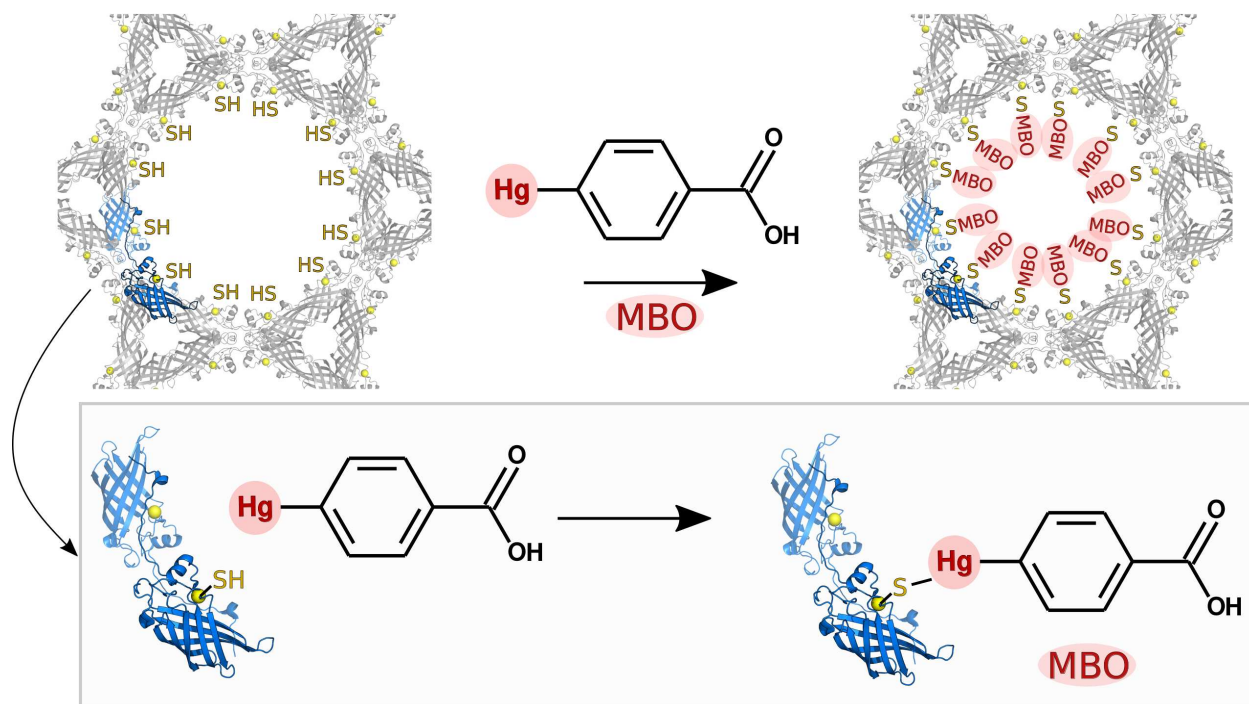

**Figure S5.** Due to the strong propensity of thiols to covalently bind mercury, mercuribenzoic acid (MBO) was used to demonstrate the accessibility of the engineered cysteines to the solvent channels. The resulting heavy atom adducts were easy to observe via XRD.

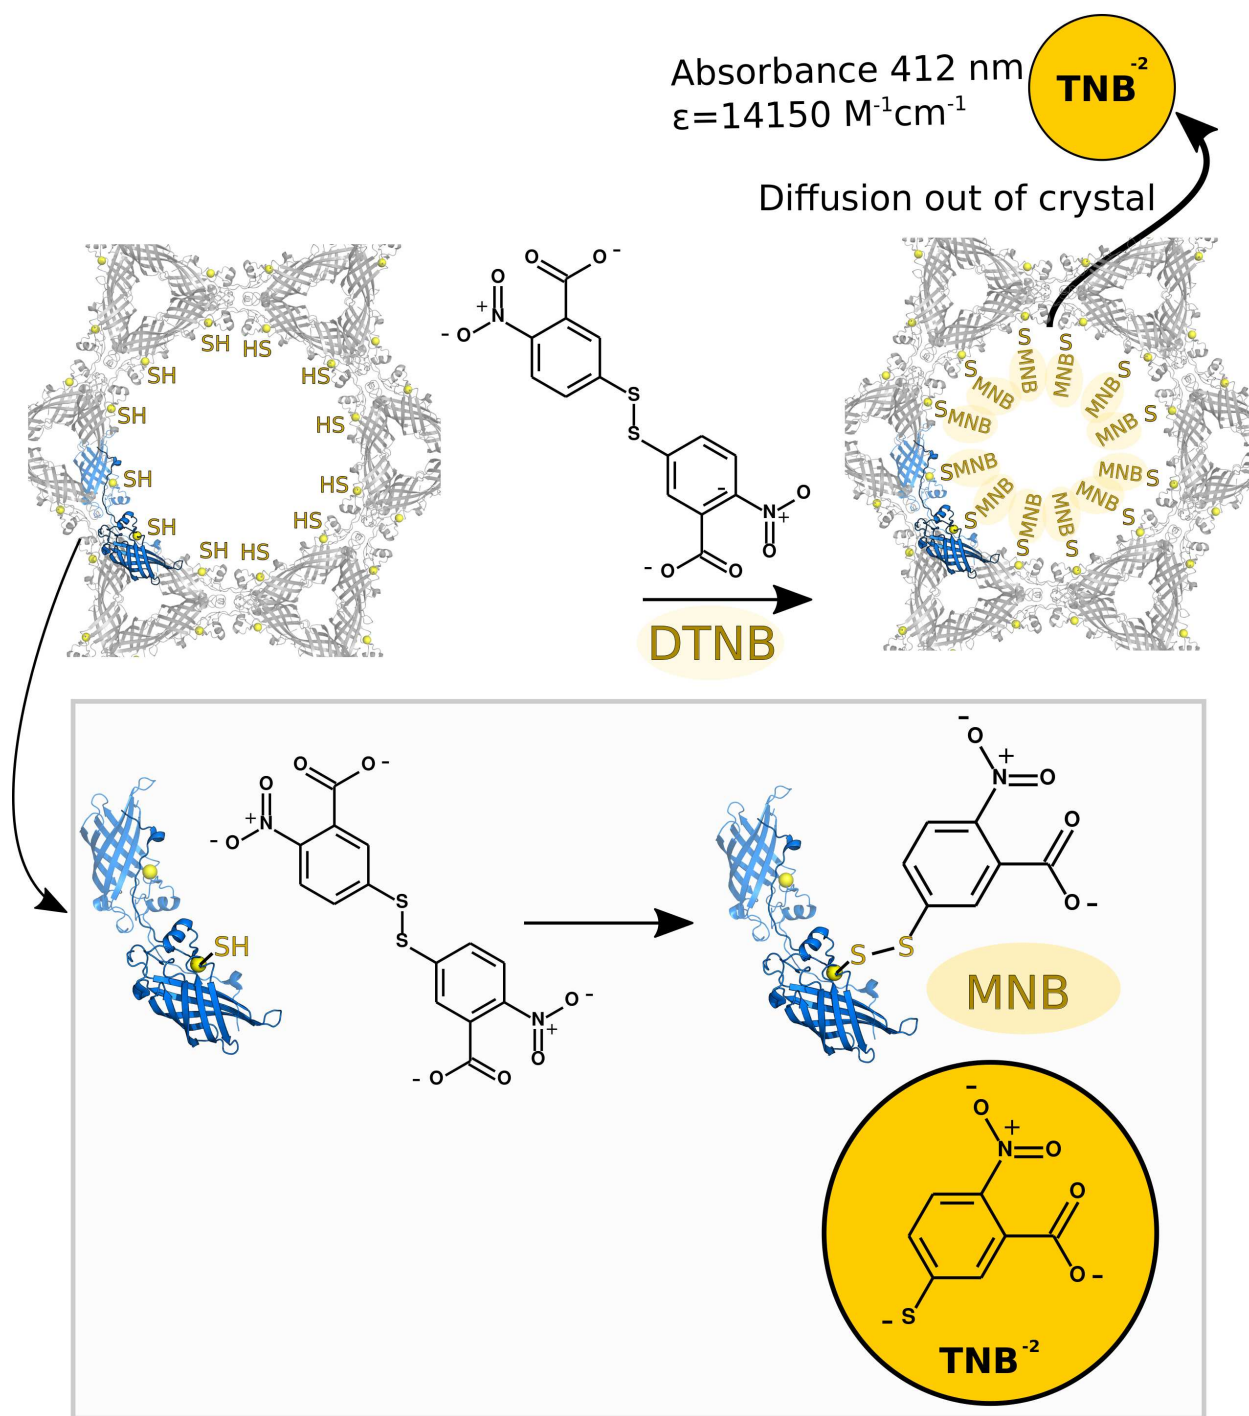

**Figure S6.** Ellman's reagent (5,5'-dithio-bis-[2-nitrobenzoic acid]) reacts with thiols via an  $\text{S}_\text{N}2$  reaction that forms a mixed disulfide product with the addition of 5-mercapto-2-nitro-benzoic acid (MNB) to reduced thiols. The reaction can be monitored by measuring the release of 2-nitro-5-thiobenzoate anion ( $\text{TNB}^{-2}$ ), which absorbs strongly at 412 nm due to the resonance stabilized 4-thiopyridone tautomer. These properties made Ellman's reagent an attractive choice for demonstrating disulfide exchange in CJ cysteine mutant crystals.

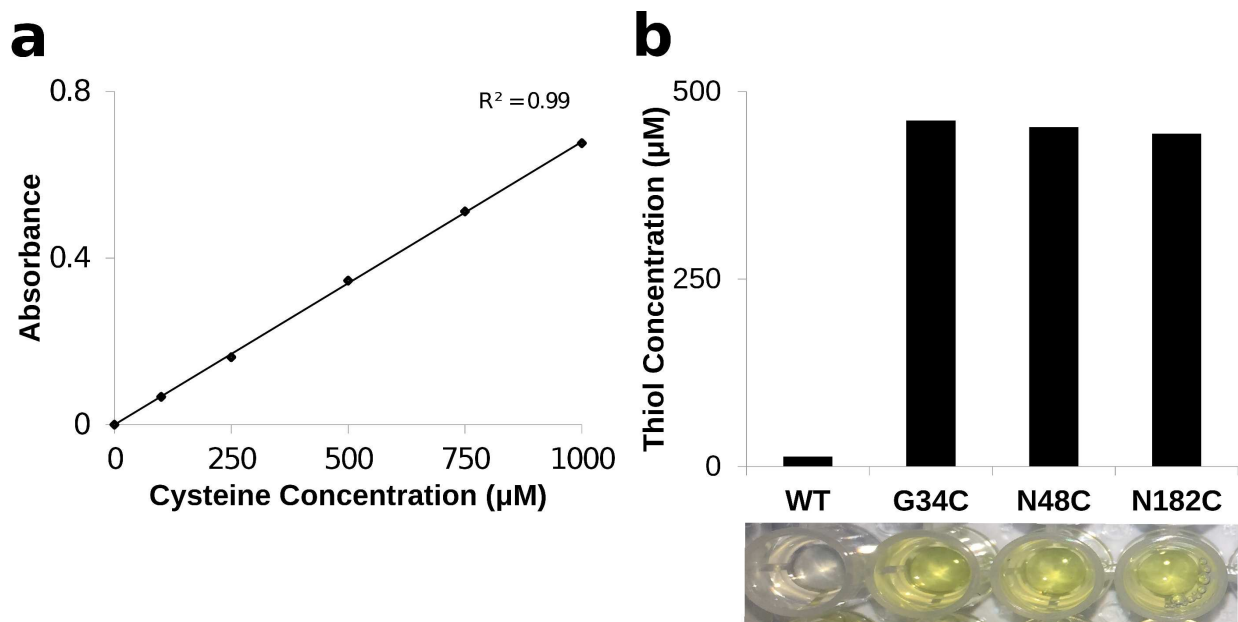

**Figure S7.** Thiol concentration in solution can be measured by addition of Ellman's reagent and measuring absorbance 412 nm. **(a)** An *in vitro* Ellman's Reagent standard curve was prepared for reduced L-cysteine from 0-1000 μM. **(b)** Purified CJ-variants were diluted to ~10 mg/mL (~500 μM) and Ellman's reagent was added to confirm the presence and accessibility of thiols in solution. Only CJ-variants with engineered cysteines produced a signal at 412 nm.

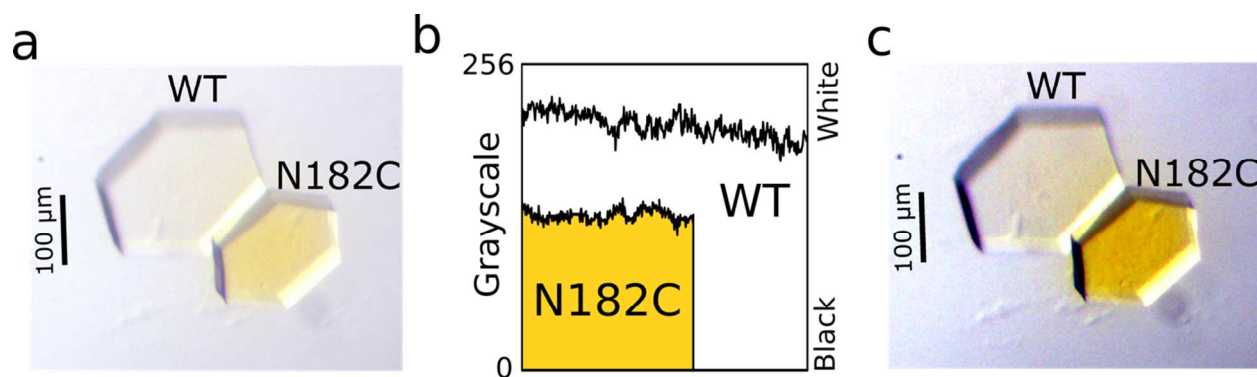

**Figure S8.** This figure is best observed in the color images available online. Wild-type and CJ cysteine mutant crystals were exposed to Ellman's reagent and extensively washed to remove unreacted Ellman's reagent. **(a)** The raw image above was obtained later, 30 seconds after adding 10 mM 2-mercaptoethanol (BME). Addition of BME produced an intense yellow signal only on CJ cysteine mutant crystals, suggesting release of covalently bound 5-mercapto-2-nitro-benzoic acid (MNB). **(b)** To quantify the difference, we use ImageJ to extract grayscale values across diagonal vectors that span each crystal (avoiding the edge effects). **(c)** The pathlength of these crystals is small, which results in a somewhat subtle signal. Here, a contrast-enhanced image assists with visualizing the difference between the crystals and better represents what is observed by eye. The contrast between the cysteine-bearing crystal and the WT crystal would likely be even larger if the two were not adjacent, since the TNB dye molecule released by the N182C crystal can diffuse into the WT crystal.

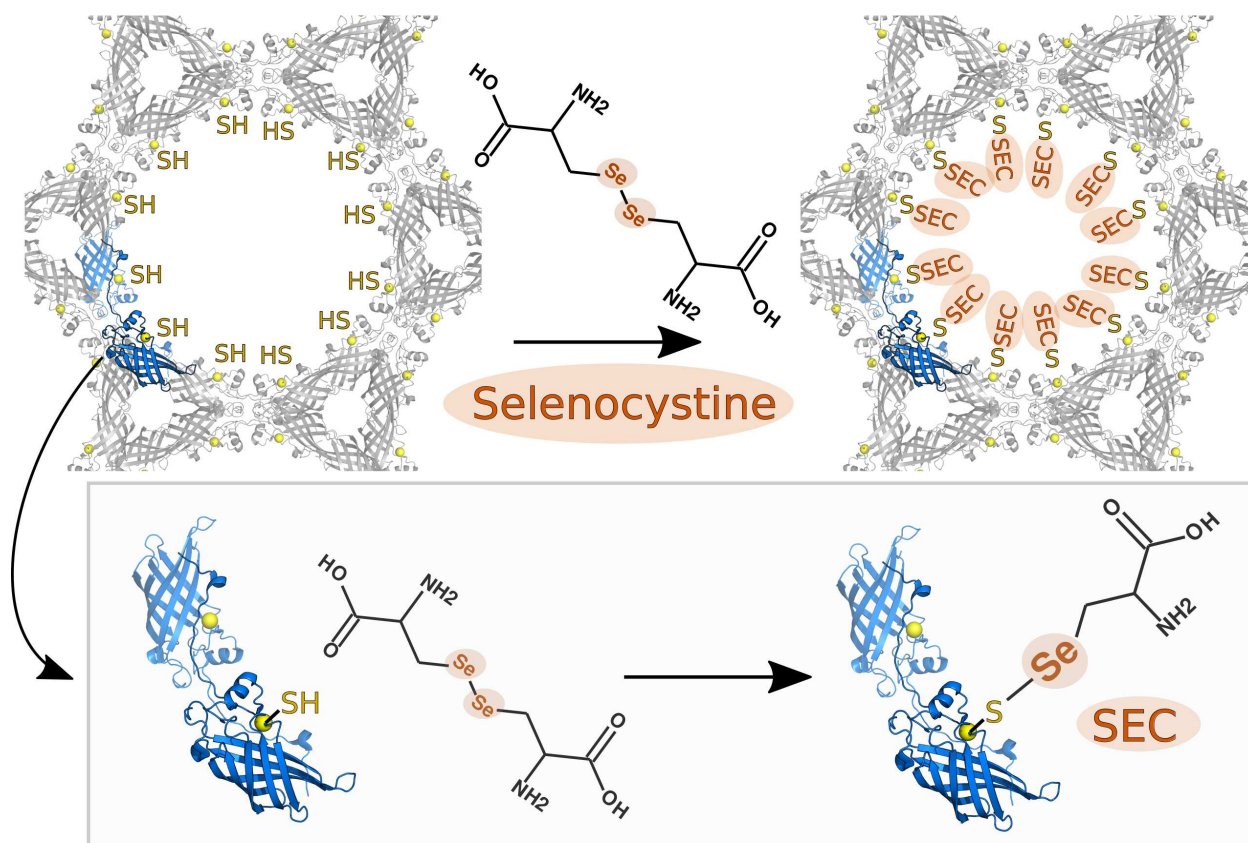

**Figure S9.** In a reaction analogous to disulfide exchange, thiols can form mixed oxidized products with diselenide compounds. The reaction of thiols with diselenides has the benefit of adding a heavy atom at the attachment point. Selenium addition was readily visible in XRD. However, the remainder of the adduct was too flexible to be clearly resolved in 2 out of 3 cases.

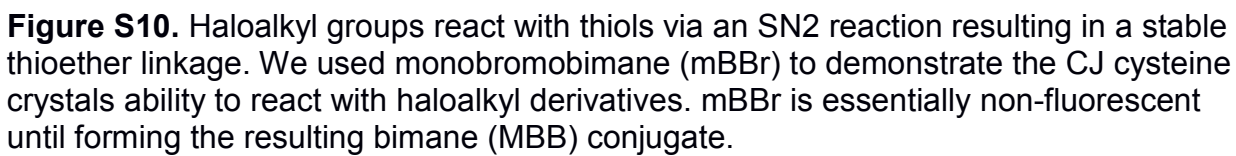

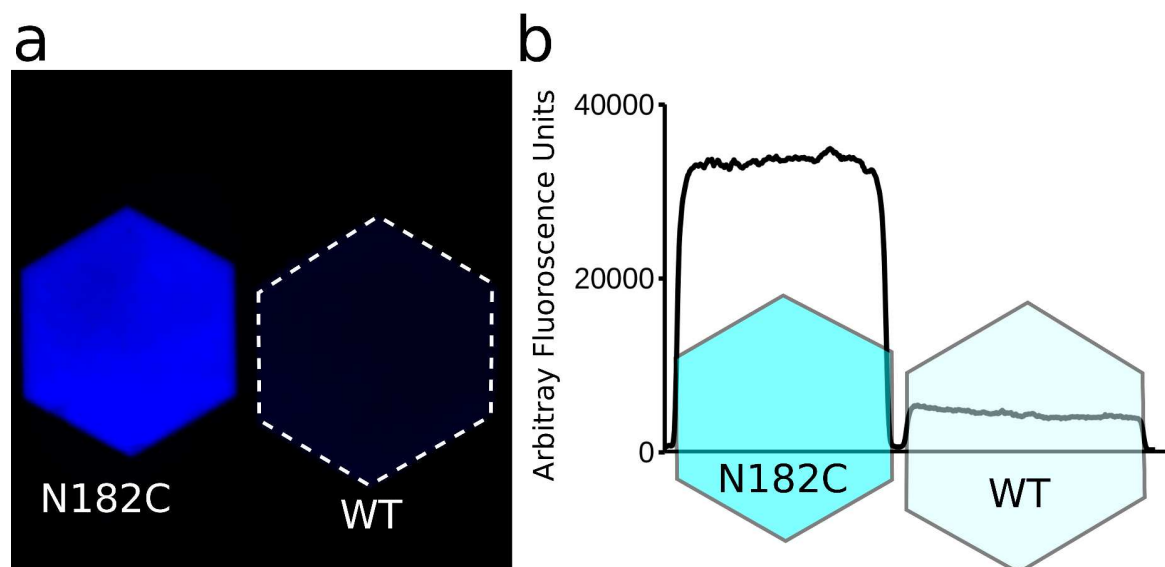

**Figure S11.** We incubated a CJ without thiol (WT) crystal and N182C crystal in a monobromobimane (mBBR) solution for 30 minutes. The crystals were then washed in 4.2 M trimethylamine-N-oxide (TMAO) pH 7.4 to remove excess reactive species. **(a)** Subsequent confocal microscopy images ( $\lambda_{\text{EX}}=405$  nm) of N182C (left) and WT (right) after exposure to mBBR. N182C was fluorescent, indicative of monobromobimane installation. **(b)** Raw pixel values for N182C (left) and WT (right) show that mBBR was selectively installed on the engineered cysteine. The WT crystal had minimal background fluorescence relative to the N182C with mBBR installed.

## Molecular Replacement Work Flow

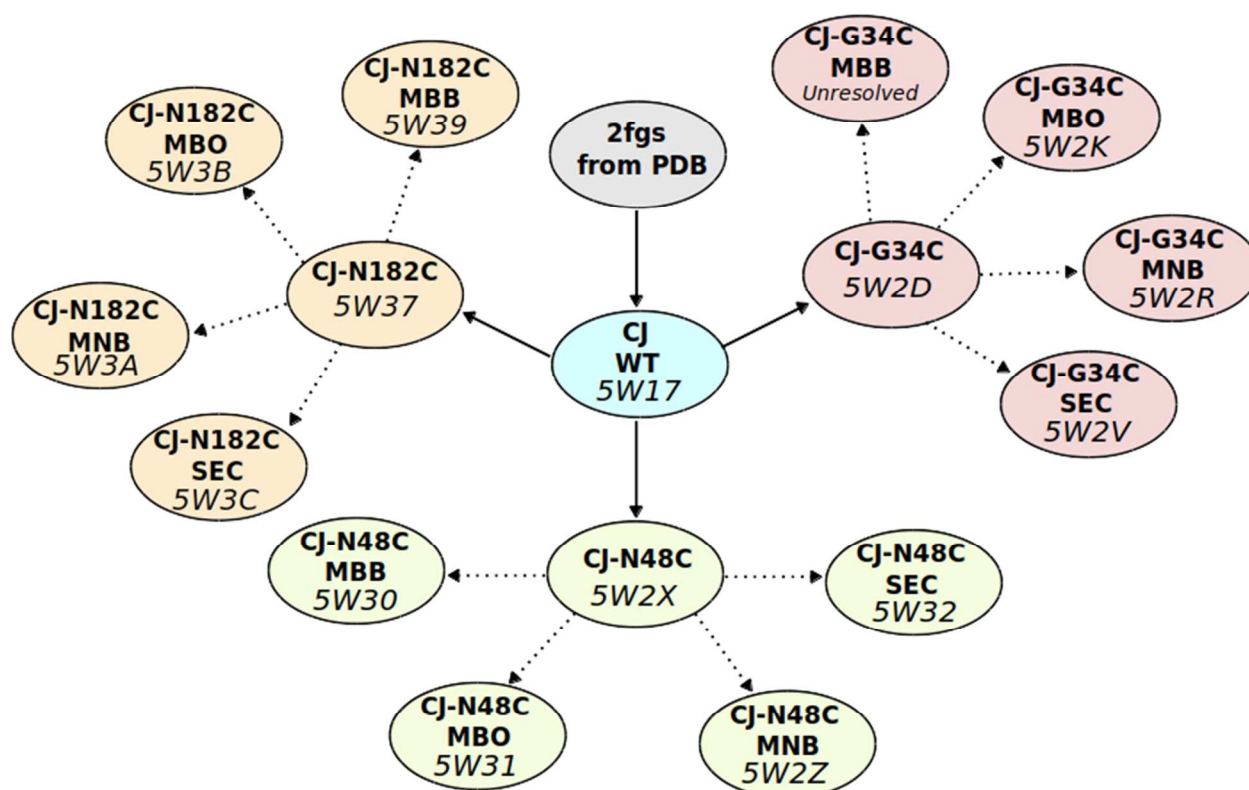

**Figure S12.** A structure for *Campylobacter jejuni* Ycel periplasmic protein at 2.9 Å resolution was deposited by authors at the New York Structure Genomics team (PDB code 2fgs). We obtained an updated model for this protein at improved resolution (2.58 Å). Improved resolution allowed for further refinement of side chains, modeling of ordered water, and placement of a ligand in the hydrophobic core of the protein. The identity of the hydrophobic ligand remains unknown, but a saturated C18 ligand was modeled as a placeholder (**Figure S18**). This improved model (CJ WT) served as the molecular replacement model for the reduced CJ thiol mutant crystals: G34C, N48C, and N182C. The new thiol mutant models further served as models for the resulting CJ thiol crystals conjugated with small molecules. Non-trivial changes from the input molecular replacement model were only made if there was a strong reason such as improved side chain resolution, disrupted hydrogen bond network, modeling new features in the electron density, etc.

## Building Small Molecule Installation Structures

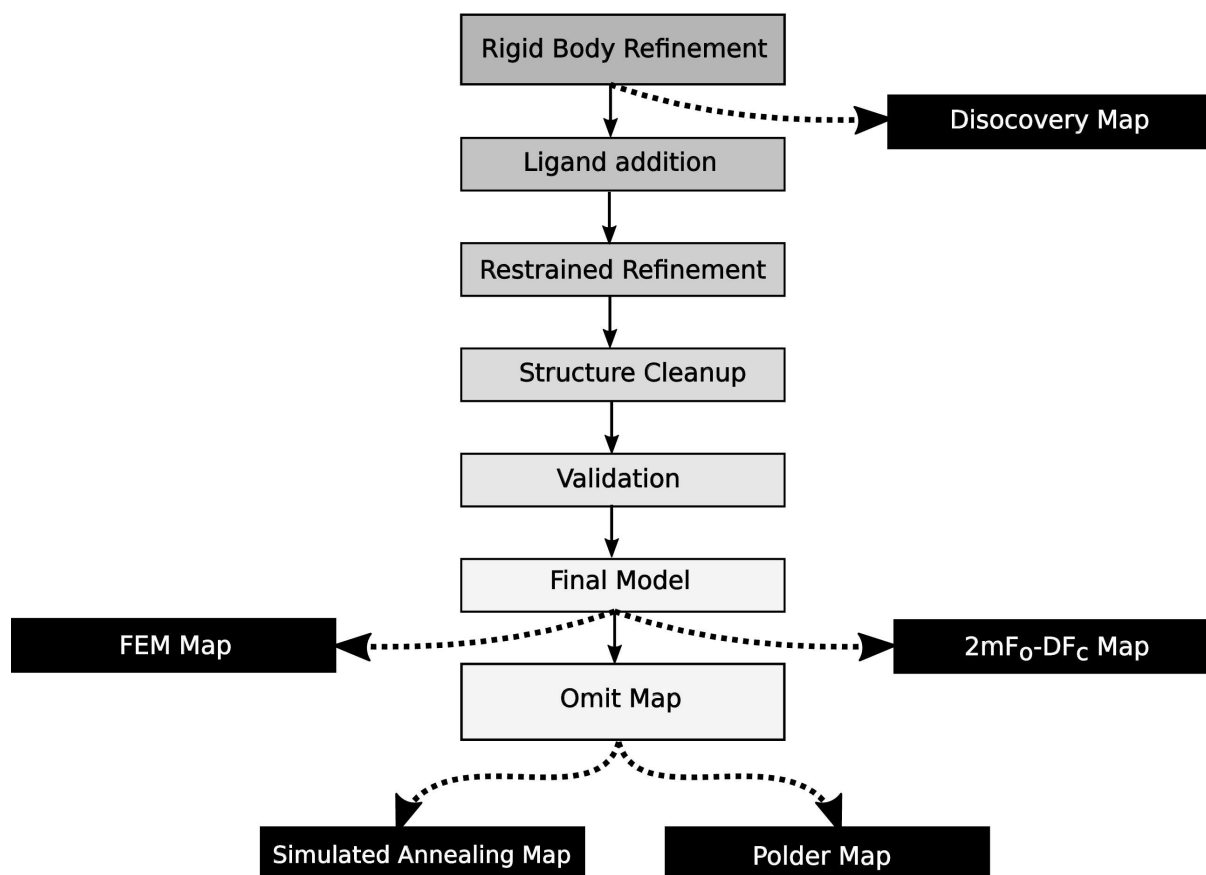

**Figure S13.** To prevent bias, all structures with installed small molecules were generated with the same work flow. The corresponding reduced thiol structure (without an adduct) was used as a molecular replacement model. An initial “discovery map” was generated by performing rigid body refinement and identifying large map peaks suggestive of small molecule installation. Next, the probable small molecule is added to the observed electron density and a conformation was selected based on the local environment and preferred geometries. Restrained refinement was performed on the resulting structure and the occupancy of the ligand was adjusted to minimize difference map peaks. The remaining structure was refined to improve interactions and fit observed electron density. The structure was then validated on the PDB server and the final model was prepared. From the final model, we generated 2mF<sub>o</sub>-DF<sub>c</sub> maps for Figure 2 in the main text. We additionally generated FEM maps<sup>1</sup> to assess adduct placement. To further guard against bias, we generated Polder omit maps using phenix.polder.<sup>2</sup> The Polder maps also exclude bulk solvent from the immediate neighborhood of the adduct. Finally, we used phenix.composite\_omit\_map to generate conventional simulated annealing<sup>3</sup> omit maps with harmonic restraints. These maps are

compared for each installation site in **Figure S15** (G34C), **S16** (N48C), and **S17** (N182C).

|                                                     | CJ-WT                   | G34C                    | N48C                    | N182C                   |
|-----------------------------------------------------|-------------------------|-------------------------|-------------------------|-------------------------|
| <b>Data Collection</b>                              |                         |                         |                         |                         |
| Light Source                                        | Synchrotron             | Synchrotron             | Synchrotron             | Synchrotron             |
| Wavelength (Å)                                      | 1.0                     | 1.0                     | 1.0                     | 1.0                     |
| Spacegroup                                          | <i>P</i> 6 2 2          |
| Cell dimensions                                     |                         |                         |                         |                         |
| a, b, c (Å)                                         | 178.81, 178.81, 50.34   | 178.88, 178.88, 50.72   | 179.15, 179.15, 50.77   | 178.43, 178.43, 50.58   |
| $\alpha, \beta, \gamma$ (°)                         | 90.00, 90.00, 120.00    | 90.00, 90.00, 120.00    | 90.00, 90.00, 120.00    | 90.00, 90.00, 120.00    |
| Resolution (Å)                                      | 38.71-2.58 (2.72-2.58)* | 38.73-2.70 (2.85-2.70)* | 38.79-2.73 (2.88-2.73)* | 38.63-2.52 (2.66-2.52)* |
| Mesaured reflections                                | 313158                  | 280434                  | 278863                  | 336425                  |
| Unique reflections                                  | 15452                   | 13638                   | 13248                   | 16542                   |
| Completeness (%)                                    | 99.9 (99.6)             | 99.9 (100.0)            | 99.8 (98.9)             | 99.9 (99.5)             |
| Redundancy                                          | 20.3 (19.9)             | 20.6 (21.2)             | 21.0 (21.8)             | 20.3 (17.4)             |
| <i>R</i> <sub>pim</sub>                             | 0.051 (0.690)           | 0.047 (0.694)           | 0.044 (1.472)           | 0.031 (0.733)           |
| <i>cc</i> <sub>1/2</sub>                            | 0.997 (0.897)           | 0.999 (0.761)           | 0.999 (0.788)           | 0.999 (0.784)           |
| <i>I</i> / $\sigma$ ( <i>I</i> )                    | 10.2 (1.0)              | 13.2 (1.0)              | 13.5 (1.0)              | 22.8 (1.0)              |
| <b>Refinement</b>                                   |                         |                         |                         |                         |
| <i>R</i> <sub>work</sub> / <i>R</i> <sub>free</sub> | 0.2212/0.2537           | 0.2299/0.2713           | 0.2100/0.2393           | 0.2149/0.2578           |
| No. Atoms                                           |                         |                         |                         |                         |
| Protein                                             | 1321                    | 1323                    | 1319                    | 1319                    |
| LFA                                                 | 17                      | 17                      | 17                      | 17                      |
| SO4                                                 | 10                      | 10                      | 10                      | 10                      |
| Water                                               | 21                      | 18                      | 17                      | 21                      |
| B-Factors                                           |                         |                         |                         |                         |
| Protein                                             | 69.69                   | 94.25                   | 83.69                   | 80.47                   |
| LFA                                                 | 69.11                   | 88.35                   | 81.92                   | 75.38                   |
| SO4                                                 | 75.29                   | 101.22                  | 89.43                   | 92.45                   |
| Water                                               | 57.53                   | 79.65                   | 68.6                    | 72.66                   |
| RMSD                                                |                         |                         |                         |                         |
| Bond lengths (Å)                                    | 0.013                   | 0.013                   | 0.014                   | 0.014                   |
| Bond angles (°)                                     | 1.856                   | 1.826                   | 1.918                   | 1.935                   |
| Ramachandran plot (%)                               |                         |                         |                         |                         |
| Favored region                                      | 0.947                   | 0.941                   | 0.935                   | 0.935                   |
| Allowed region                                      | 0.053                   | 0.059                   | 0.065                   | 0.065                   |
| Outlier region                                      | 0                       | 0                       | 0                       | 0                       |

\* values in parantheses are for high resolution shell

**Table S1.** Crystallography data collection and refinement statistics for CJ without thiol (CJ-WT), G34C, N48C, and N182C.

|                                                     | G34C-MBO                | N48C-MBO                | N182C-MBO               |
|-----------------------------------------------------|-------------------------|-------------------------|-------------------------|
| <b>Data Collection</b>                              |                         |                         |                         |
| Light Source                                        | Synchrotron             | Synchrotron             | Synchrotron             |
| Wavelength (Å)                                      | 1.0                     | 1.0                     | 1.0                     |
| Spacegroup                                          | <i>P</i> 6 2 2          | <i>P</i> 6 2 2          | <i>P</i> 6 2 2          |
| Cell dimensions                                     |                         |                         |                         |
| a, b, c (Å)                                         | 178.81, 178.81, 50.64   | 178.79, 178.79, 50.81   | 179.07, 179.07, 50.65   |
| $\alpha$ , $\beta$ , $\gamma$ (°)                   | 90.00, 90.00, 120.00    | 90.00, 90.00, 120.00    | 90.00, 90.00, 120.00    |
| Resolution (Å)                                      | 38.71-2.78 (2.93-2.78)* | 38.71-2.56 (2.70-2.56)* | 38.77-2.70 (2.85-2.70)* |
| Mesaured reflections                                | 244820                  | 330151                  | 245372                  |
| Unique reflections                                  | 12465                   | 15939                   | 13431                   |
| Completeness (%)                                    | 99.7 (98.2)             | 99.9 (99.9)             | 98.8 (92.2)             |
| Redundancy                                          | 19.6 (13.9)             | 20.7 (19.0)             | 18.3 (7.4)              |
| <i>R</i> <sub>pim</sub>                             | 0.039 (0.770)           | 0.040 (0.628)           | 0.025 (0.441)           |
| <i>cc</i> <sub>1/2</sub>                            | 0.999 (0.758)           | 0.999 (0.857)           | 0.999 (0.875)           |
| <i>I</i> / $\sigma$ ( <i>I</i> )                    | 11.4 (1.0)              | 14.4 (1.0)              | 20.7 (1.4)              |
| <b>Refinement</b>                                   |                         |                         |                         |
| <i>R</i> <sub>work</sub> / <i>R</i> <sub>free</sub> | 0.2214/0.2614           | 0.2133/0.2412           | 0.2047/0.2281           |
| No. Atoms                                           |                         |                         |                         |
| Protein                                             | 1323                    | 1315                    | 1316                    |
| LFA                                                 | 17                      | 17                      | 17                      |
| SO4                                                 | 10                      | 10                      | 10                      |
| Water                                               | 18                      | 17                      | 21                      |
| MBO                                                 | 1                       | 10                      | 11                      |
| B-Factors                                           |                         |                         |                         |
| Protein                                             | 94.44                   | 76.12                   | 73.56                   |
| LFA                                                 | 93.26                   | 75.64                   | 66.64                   |
| SO4                                                 | 106.09                  | 78.6                    | 79.72                   |
| Water                                               | 80.18                   | 66.85                   | 62.05                   |
| MBO                                                 | 305.21                  | 111.11                  | 74.8                    |
| RMSD                                                |                         |                         |                         |
| Bond lengths (Å)                                    | 0.013                   | 0.014                   | 0.062                   |
| Bond angles (°)                                     | 1.843                   | 1.94                    | 2.013                   |
| Ramachandran plot (%)                               |                         |                         |                         |
| Favored region                                      | 0.917                   | 0.935                   | 0.976                   |
| Allowed region                                      | 0.083                   | 0.065                   | 0.024                   |
| Outlier region                                      | 0                       | 0                       | 0                       |

\* values in parantheses are for high resolution shell

**Table S2.** Crystallography data collection and refinement statistics for installation of mercuribenzoic acid (MBO) on G34C, N48C, and N182C.

|                                                     | G34C-MNB                | N48C-MNB                | N182C-MNB               |
|-----------------------------------------------------|-------------------------|-------------------------|-------------------------|
| <b>Data Collection</b>                              |                         |                         |                         |
| Light Source                                        | Synchrotron             | Synchrotron             | Rigaku Homelab          |
| Wavelength (Å)                                      | 1.0                     | 1.0                     | 1.54187                 |
| Spacegroup                                          | <i>P</i> 6 2 2          | <i>P</i> 6 2 2          | <i>P</i> 6 2 2          |
| Cell dimensions                                     |                         |                         |                         |
| a, b, c (Å)                                         | 178.34, 178.34, 50.32   | 179.86, 179.86, 50.62   | 180.33, 180.33, 50.57   |
| $\alpha$ , $\beta$ , $\gamma$ (°)                   | 90.00, 90.00, 120.00    | 90.00, 90.00, 120.00    | 90.00, 90.00, 120.00    |
| Resolution (Å)                                      | 38.61-2.90 (3.06-2.90)* | 38.94-2.80 (2.95-2.80)* | 48.11-2.76 (2.91-2.76)* |
| Mesaured reflections                                | 219589                  | 255445                  | 222910                  |
| Unique reflections                                  | 10917                   | 12372                   | 12968                   |
| Completeness (%)                                    | 99.7 (99.1)             | 99.9 (99.8)             | 100.0 (100.0)           |
| Redundancy                                          | 20.1 (20.0)             | 20.6 (20.9)             | 17.2 (9.4)              |
| <i>R</i> <sub>pim</sub>                             | 0.059 (0.945)           | 0.049 (1.050)           | 0.080 (0.805)           |
| <i>cc</i> <sub>1/2</sub>                            | 0.998 (0.909)           | 0.998 (0.688)           | 0.994 (0.390)           |
| <i>I</i> / $\sigma$ ( <i>I</i> )                    | 9.4 (1.0)               | 11.2 (1.0)              | 9.0 (1.0)               |
| <b>Refinement</b>                                   |                         |                         |                         |
| <i>R</i> <sub>work</sub> / <i>R</i> <sub>free</sub> | 0.2158/0.2732           | 0.2032/0.2358           | 0.2371/0.2746           |
| No. Atoms                                           |                         |                         |                         |
| Protein                                             | 1323                    | 1315                    | 1315                    |
| LFA                                                 | 17                      | 17                      | 17                      |
| SO4                                                 | 10                      | 10                      | 10                      |
| Water                                               | 17                      | 21                      | 22                      |
| MNB                                                 | 13                      | 13                      | 13                      |
| B-Factors                                           |                         |                         |                         |
| Protein                                             | 101.1                   | 79.34                   | 53.78                   |
| LFA                                                 | 94.44                   | 78.64                   | 52.35                   |
| SO4                                                 | 106.39                  | 85.1                    | 57.6                    |
| Water                                               | 84.9                    | 73.96                   | 40.14                   |
| MNB                                                 | 161.51                  | 163.36                  | 106.77                  |
| RMSD                                                |                         |                         |                         |
| Bond lengths (Å)                                    | 0.012                   | 0.013                   | 0.013                   |
| Bond angles (°)                                     | 1.688                   | 1.884                   | 1.77                    |
| Ramachandran plot (%)                               |                         |                         |                         |
| Favored region                                      | 0.917                   | 0.947                   | 0.947                   |
| Allowed region                                      | 0.083                   | 0.053                   | 0.047                   |
| Outlier region                                      | 0                       | 0                       | 0.006                   |

\* values in parantheses are for high resolution shell

**Table S3.** Crystallography data collection and refinement statistics for installation of 5-mercapto-2-nitro-benzoic acid (MNB) on G34C, N48C, and N182C.

|                                                     | G34C-SEC                | N48C-SEC                | N182C-SEC               |
|-----------------------------------------------------|-------------------------|-------------------------|-------------------------|
| <b>Data Collection</b>                              |                         |                         |                         |
| Light Source                                        | Synchrotron             | Synchrotron             | Rigaku Homelab          |
| Wavelength (Å)                                      | 1.0                     | 1.0                     | 1.54187                 |
| Spacegroup                                          | <i>P</i> 6 2 2          | <i>P</i> 6 2 2          | <i>P</i> 6 2 2          |
| Cell dimensions                                     |                         |                         |                         |
| a, b, c (Å)                                         | 178.02, 178.02, 50.71   | 178.62, 178.62, 50.81   | 180.34, 180.34, 50.59   |
| $\alpha$ , $\beta$ , $\gamma$ (°)                   | 90.00, 90.00, 120.00    | 90.00, 90.00, 120.00    | 90.00, 90.00, 120.00    |
| Resolution (Å)                                      | 38.54-2.90 (3.06-2.90)* | 38.67-2.63 (2.77-2.63)* | 48.13-2.87 (3.03-2.87)* |
| Mesaured reflections                                | 203030                  | 287615                  | 192807                  |
| Unique reflections                                  | 10946                   | 14539                   | 11574                   |
| Completeness (%)                                    | 99.7 (98.3)             | 98.8 (92.5)             | 100.0 (100.0)           |
| Redundancy                                          | 18.5 (12.5)             | 19.8 (12.3)             | 16.7 (7.5)              |
| <i>R</i> <sub>pim</sub>                             | 0.048 (0.675)           | 0.022 (0.464)           | 0.074 (0.723)           |
| <i>cc</i> <sub>1/2</sub>                            | 0.999 (0.783)           | 0.999 (0.888)           | 0.994 (0.412)           |
| <i>I</i> / $\sigma$ ( <i>I</i> )                    | 10.7 (1.0)              | 25.5 (1.6)              | 9.4 (1.0)               |
| <b>Refinement</b>                                   |                         |                         |                         |
| <i>R</i> <sub>work</sub> / <i>R</i> <sub>free</sub> | 0.2127/0.2608           | 0.2140/0.2360           | 0.2334/0.2738           |
| No. Atoms                                           |                         |                         |                         |
| Protein                                             | 1323                    | 1315                    | 1319                    |
| LFA                                                 | 17                      | 17                      | 17                      |
| SO4                                                 | 10                      | 10                      | 10                      |
| Water                                               | 16                      | 16                      | 19                      |
| SEC                                                 | 2                       | 7                       | 7                       |
| B-Factors                                           |                         |                         |                         |
| Protein                                             | 100.35                  | 75.55                   | 54.61                   |
| LFA                                                 | 86.03                   | 80.95                   | 49.6                    |
| SO4                                                 | 103.86                  | 83.5                    | 56.38                   |
| Water                                               | 80.47                   | 65.49                   | 33.78                   |
| SEC                                                 | 199.22                  | 168.95                  | 117.46                  |
| RMSD                                                |                         |                         |                         |
| Bond lengths (Å)                                    | 0.012                   | 0.015                   | 0.012                   |
| Bond angles (°)                                     | 1.693                   | 2.051                   | 1.816                   |
| Ramachandran plot (%)                               |                         |                         |                         |
| Favored region                                      | 0.935                   | 0.935                   | 0.953                   |
| Allowed region                                      | 0.065                   | 0.065                   | 0.047                   |
| Outlier region                                      | 0                       | 0                       | 0                       |

\* values in parantheses are for high resolution shell

**Table S4.** Crystallography data collection and refinement statistics for installation of selenocysteine (SEC) on G34C, N48C, and N182C.

|                                                     | N48C-MBB                | N182C-MBB               |
|-----------------------------------------------------|-------------------------|-------------------------|
| <b>Data Collection</b>                              |                         |                         |
| Light Source                                        | Synchrotron             | Synchrotron             |
| Wavelength (Å)                                      | 1.0                     | 1.0                     |
| Spacegroup                                          | <i>P</i> 6 2 2          | <i>P</i> 6 2 2          |
| Cell dimensions                                     |                         |                         |
| a, b, c (Å)                                         | 180.25, 180.25, 50.97   | 178.24, 178.24, 50.60   |
| $\alpha, \beta, \gamma$ (°)                         | 90.00, 90.00, 120.00    | 90.00, 90.00, 120.00    |
| Resolution (Å)                                      | 39.03-2.75 (2.90-2.75)* | 38.59-2.48 (2.61-2.48)* |
| Mesaured reflections                                | 253774                  | 339182                  |
| Unique reflections                                  | 13196                   | 17262                   |
| Completeness (%)                                    | 100.0 (100.0)           | 99.6 (97.7)             |
| Redundancy                                          | 19.2 (17.9)             | 19.6 (14.3)             |
| <i>R</i> <sub>pim</sub>                             | 0.060 (0.728)           | 0.029 (0.711)           |
| <i>cc</i> 1/2                                       | 0.998 (0.678)           | 0.999 (0.772)           |
| <i>I</i> / $\sigma$ ( <i>I</i> )                    | 11.4 (1.0)              | 22.4 (1.0)              |
| <b>Refinement</b>                                   |                         |                         |
| <i>R</i> <sub>work</sub> / <i>R</i> <sub>free</sub> | 0.2114/0.2457           | 0.2175/0.2448           |
| No. Atoms                                           |                         |                         |
| Protein                                             | 1319                    | 1319                    |
| LFA                                                 | 17                      | 17                      |
| SO4                                                 | 10                      | 10                      |
| Water                                               | 18                      | 23                      |
| MBB                                                 | 14                      | 14                      |
| B-Factors                                           |                         |                         |
| Protein                                             | 80.3                    | 72.36                   |
| LFA                                                 | 75.05                   | 71.72                   |
| SO4                                                 | 86.87                   | 65.39                   |
| Water                                               | 63.13                   | 65.72                   |
| MBB                                                 | 171.48                  | 112.63                  |
| RMSD                                                |                         |                         |
| Bond lengths (Å)                                    | 0.014                   | 0.015                   |
| Bond angles (°)                                     | 1.898                   | 2.013                   |
| Ramachandran plot (%)                               |                         |                         |
| Favored region                                      | 0.953                   | 0.941                   |
| Allowed region                                      | 0.047                   | 0.059                   |
| Outlier region                                      | 0                       | 0                       |

\* values in parantheses are for high resolution shell

**Table S5.** Crystallography data collection and refinement statistics for installation of monobromobimane (MBB) on N48C and N182C.

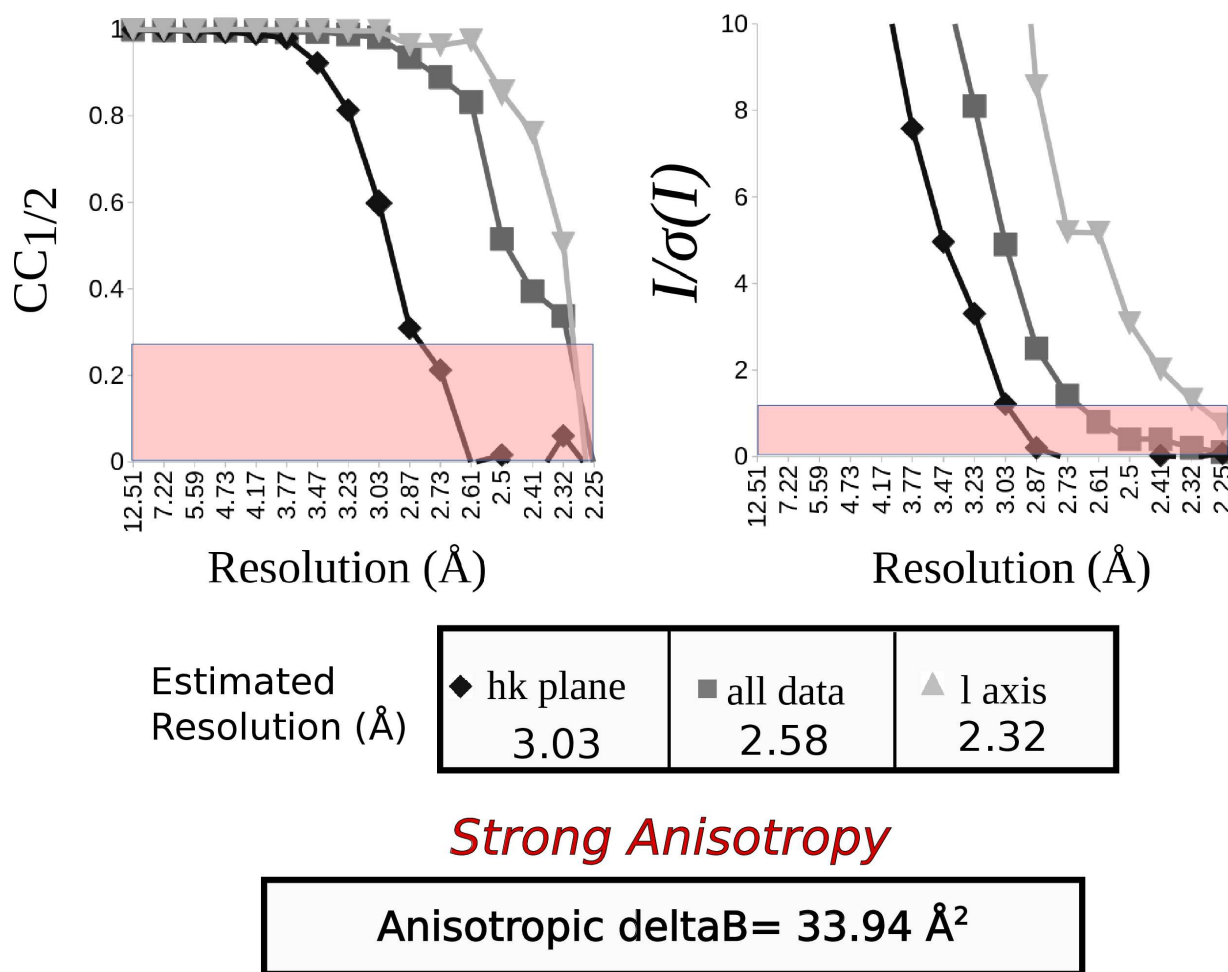

**Figure S14.** Resolution estimates were determined by identifying the highest resolution shell that satisfied the following criteria:  $I/\sigma(I) > 1$ , completeness  $> 90\%$ , and  $cc_{1/2} > 0.3$ . The resulting data refinement statistics revealed  $R_{merge}$  values in the high-resolution shell that were mathematically nonsensical (i.e.  $> 100\%$ ). Most likely, this can be attributed to the high anisotropy of the datasets. The data scaling program *aimless* provides anisotropic data refinement statistics.<sup>4</sup> For the P622 symmetry of the CJ crystals, the data were separated for analysis of the hk plane and l axis. Data for CJ WT were scaled using *aimless* and the decoupling revealed strong anisotropy. Anisotropy is not surprising, given the unusually large solvent nanopores (13 nm diameter) that run through these crystals parallel to the c axis.

Applying the same rules of thumb for resolution estimates, the cutoff for the hk plane and l axis are 3.03 Å and 2.32 Å respectively. For this dataset, the  $R_{merge}$  for the full dataset would be an acceptable 66.7% if we were to apply the hk plane derived 3.03 Å high-resolution cutoff for the full dataset. However, such a conservative approach would leave valid and useful data unused. At 3.03 Å, the l-axis data is of very high quality:  $cc_{1/2} > 0.996$  and  $I/\sigma(I) = 16.17$ . Furthermore, Diedrichs and Karplus have demonstrated

that there is no harm to the model R values when weaker higher resolution data is preserved, and that  $cc_{1/2}$  is a better indicator for the resulting model quality than  $R_{\text{merge}}$ .<sup>5,6</sup> Thus, we decided to keep the high-resolution data, rather than maintain traditional  $R_{\text{merge}}$  values. The resolution cutoff for all but two datasets were determined by the  $I/\sigma(I) > 1$  rule of thumb (the others, N48C-SEC and N182C-MBO were determined by completeness >90%) and we maintained very high  $cc_{1/2}$  for all high-resolution shells.

Structure refinement programs such as *Refmac*, handle anisotropy in the data to some degree. We were able to obtain acceptable refinement statistics with anisotropic corrections from *Refmac*. However, structure refinement may get “stuck” with highly anisotropic data, resulting in high R values and poorly resolved side chains. Because most data refinement programs use circular resolution shells, a crystallographer might be tempted to discard higher resolution data to ensure suitable refinement statistics. Recently Strong and coworkers developed techniques for ellipsoidal scaling, which can keep strong anisotropic data, while truncating weak data in other directions at similar resolutions.<sup>7</sup> If future anisotropic data from CJ structures results in poorly resolved guest molecules or high R factors, we will consider ellipsoidal scaling as an alternative approach.

| Protein | Adduct | $e/\text{\AA}^3$<br>equivalent to<br>COOT rmsd<br>0.8 | $e/\text{\AA}^3$<br>equivalent to<br>COOT rmsd<br>1.0 | $e/\text{\AA}^3$<br>equivalent to<br>COOT rmsd<br>3.0 for Polder<br>map | $e/\text{\AA}^3$<br>equivalent to<br>COOT rmsd<br>0.8 for<br>Discovery<br>map | $e/\text{\AA}^3$<br>equivalent to<br>COOT rmsd<br>0.8 for<br>restrained<br>simulated<br>annealing<br>omit map |
|---------|--------|-------------------------------------------------------|-------------------------------------------------------|-------------------------------------------------------------------------|-------------------------------------------------------------------------------|---------------------------------------------------------------------------------------------------------------|
| WT      |        | 0.0872                                                | 0.1089                                                | NA                                                                      | NA                                                                            | NA                                                                                                            |
| N48C    |        | 0.0762                                                | 0.0952                                                | NA                                                                      | NA                                                                            | NA                                                                                                            |
| N48C    | MBO    | 0.0824                                                | 0.1031                                                | 0.1683                                                                  | 0.0727                                                                        | 0.0776                                                                                                        |
| N48C    | MNB    | 0.0777                                                | 0.971                                                 | 0.1583                                                                  | 0.0699                                                                        | 0.0769                                                                                                        |
| N48C    | SEC    | 0.0833                                                | 0.1042                                                | 0.1526                                                                  | 0.0685                                                                        | 0.0801                                                                                                        |
| N48C    | MBB    | 0.0785                                                | 0.098                                                 | 0.1592                                                                  | 0.0863                                                                        | 0.0749                                                                                                        |
| G34C    |        | 0.0721                                                | 0.09                                                  | NA                                                                      | NA                                                                            | NA                                                                                                            |
| G34C    | MBO    | 0.0713                                                | 0.0891                                                | 0.1168                                                                  | 0.0793                                                                        | 0.0653                                                                                                        |
| G34C    | MNB    | 0.066                                                 | 0.0825                                                | 0.1618                                                                  | 0.0776                                                                        | 0.0616                                                                                                        |
| G34C    | SEC    | 0.066                                                 | 0.0825                                                | 0.1145                                                                  | 0.0824                                                                        | 0.0603                                                                                                        |
| G34C    | MBB    | 0.0743                                                | 0.0928                                                | NA                                                                      | NA                                                                            | NA                                                                                                            |
| N182C   |        | 0.0784                                                | 0.098                                                 | NA                                                                      | NA                                                                            | NA                                                                                                            |
| N182C   | MBO    | 0.0846                                                | 0.1058                                                | 0.1583                                                                  | 0.0837                                                                        | 0.0817                                                                                                        |
| N182C   | MNB    | 0.1041                                                | 0.13                                                  | 0.2013                                                                  | 0.1076                                                                        | 0.0989                                                                                                        |
| N182C   | SEC    | 0.1009                                                | 0.1262                                                | 0.189                                                                   | 0.1071                                                                        | 0.0979                                                                                                        |
| N182C   | MBB    | 0.0855                                                | 0.1068                                                | 0.1532                                                                  | 0.0854                                                                        | 0.0833                                                                                                        |

**Table S6.** To most faithfully represent COOT contours in PyMOL images, we turned off the PyMOL automatic map normalization (“set normalize\_ccp4\_maps, off”) and instead directly set contour values to match the intended COOT contour level. This Table tracks the  $e/\text{\AA}^3$  values reported by COOT, when contours were set to specific rmsd values. The first two columns are for the primary .mtz file. The Polder map column corresponds to the values found for Polder omit maps ( $mF_o-DF_c$ ), contoured to 3 rmsd in COOT. The penultimate column has the values found for the rigid body discovery maps ( $2mF_o-DF_c$ ), contoured to 0.8 rmsd in COOT. The final column has the values found for the simulated annealing omit maps ( $2mF_o-DF_c$ ), contoured to 0.8 rmsd in COOT. Unlike the other maps, the FEM approach attempts to eliminate the need to choose (arbitrary) map contouring cutoffs. In PyMOL, FEM maps were always contoured with a cutoff of 1.0.

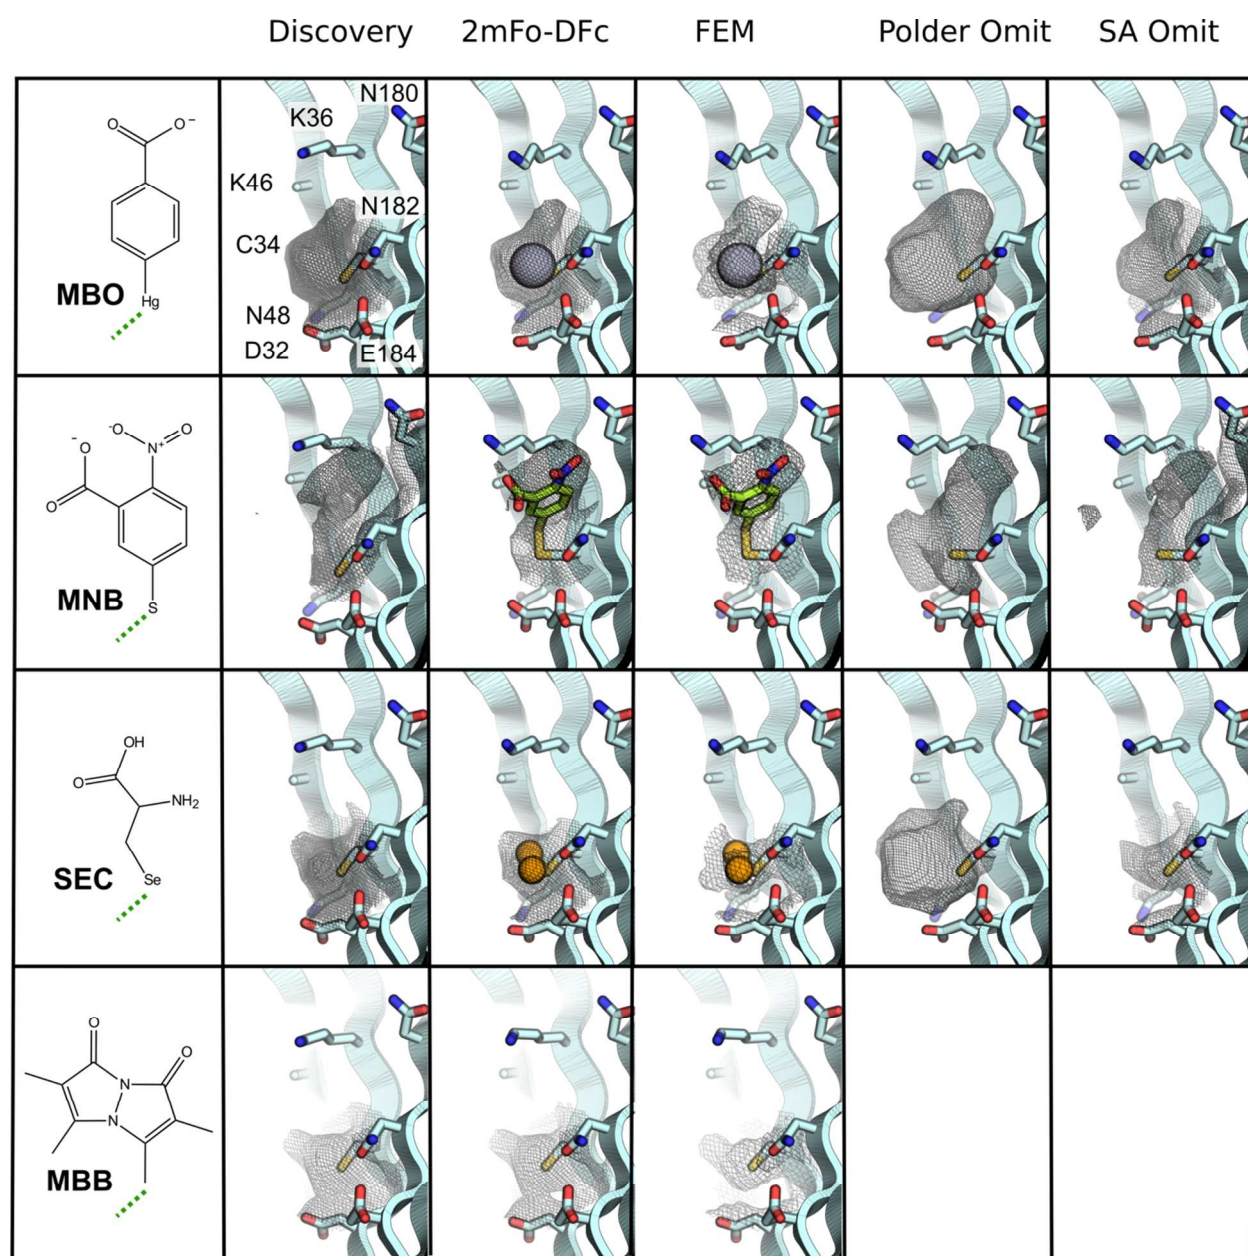

**Figure S15.** Side by side comparison of maps at the G34C installation site, including the Discovery map (contoured at  $0.8\ \sigma$ ), the standard  $2mF_o - DF_c$  map (contoured at  $0.8\ \sigma$ ), the FEM map (contoured at  $1.0$ ), and two different maps generated with all adduct atoms omitted, specifically the Polder omit map (contoured at  $3.0\ \sigma$ ) and a simulated annealing omit map with harmonic restraints (contoured at  $0.8\ \sigma$ ). In all cases, the illustrated protein coordinates are the same.

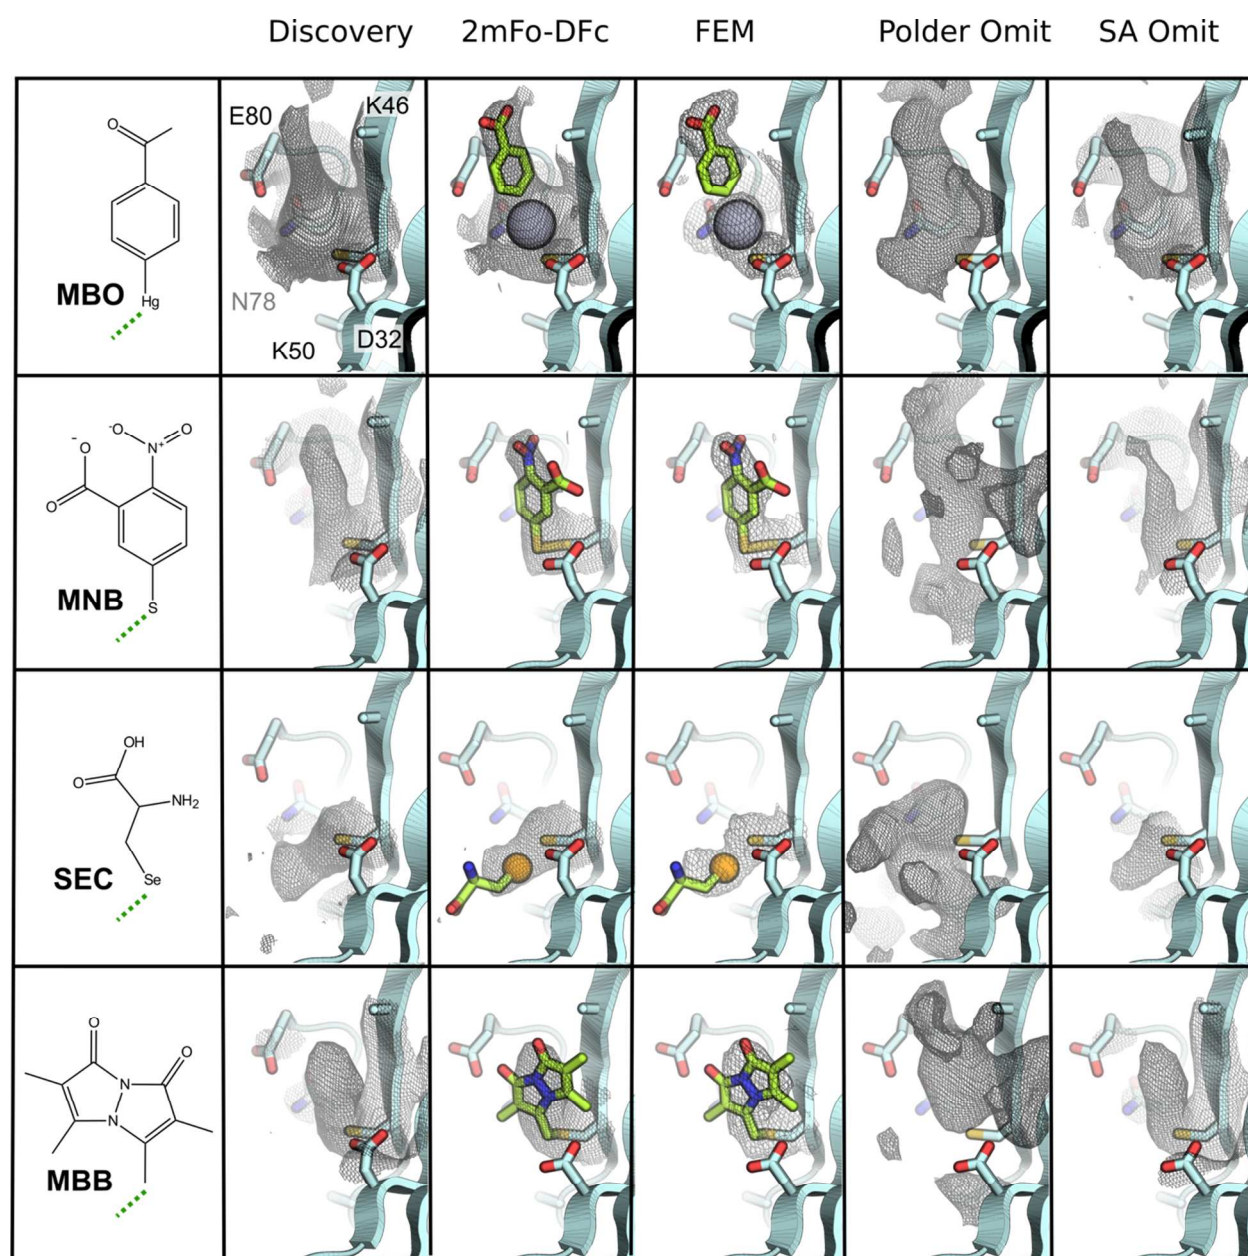

**Figure S16.** Side by side comparison of maps at the N48C installation site, including the Discovery map (contoured at  $0.8 \sigma$ ), the standard  $2mF_o - DF_c$  map (contoured at  $0.8 \sigma$ ), the FEM map (contoured at  $1.0$ ), and two different maps generated with all adduct atoms omitted, specifically the Polder omit map (contoured at  $3.0 \sigma$ ) and a simulated annealing omit map with harmonic restraints (contoured at  $0.8 \sigma$ ). In all cases, the illustrated protein coordinates are the same.

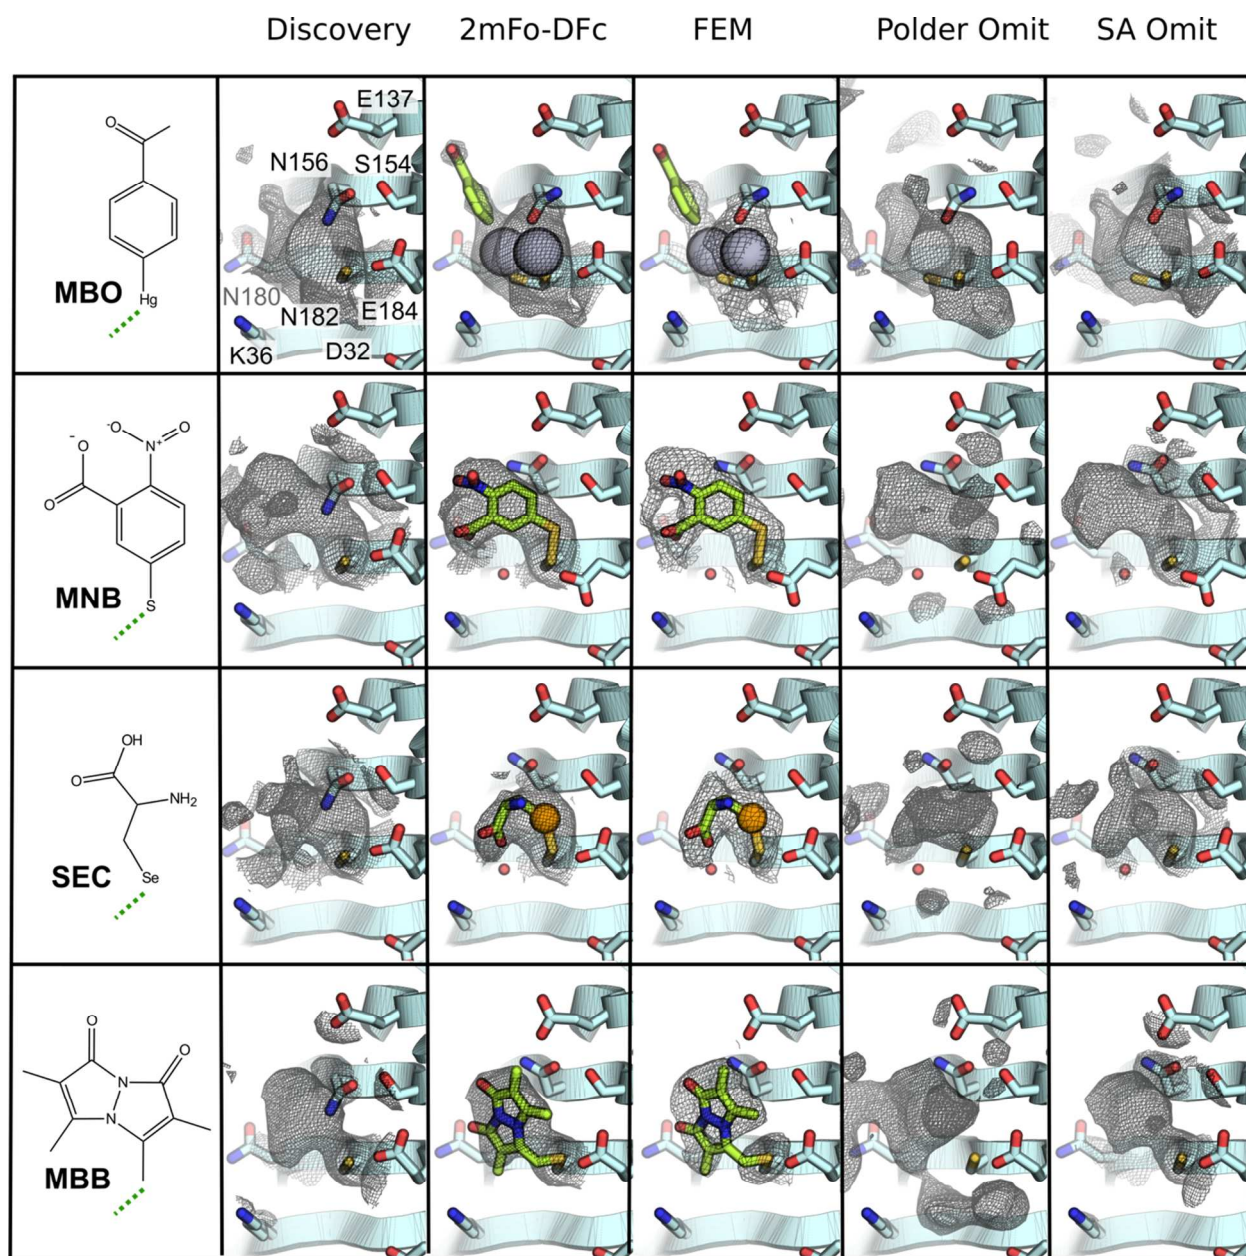

**Figure S17.** Side by side comparison of maps at the N182C installation site, including the Discovery map (contoured at  $0.8\sigma$ ), the standard  $2mF_o - DF_c$  map (contoured at  $0.8\sigma$ ), the FEM map (contoured at  $1.0$ ), and two different maps generated with all adduct atoms omitted, specifically the Polder omit map (contoured at  $3.0\sigma$ ) and a simulated annealing omit map with harmonic restraints (contoured at  $0.8\sigma$ ). In all cases, the illustrated protein coordinates are the same.

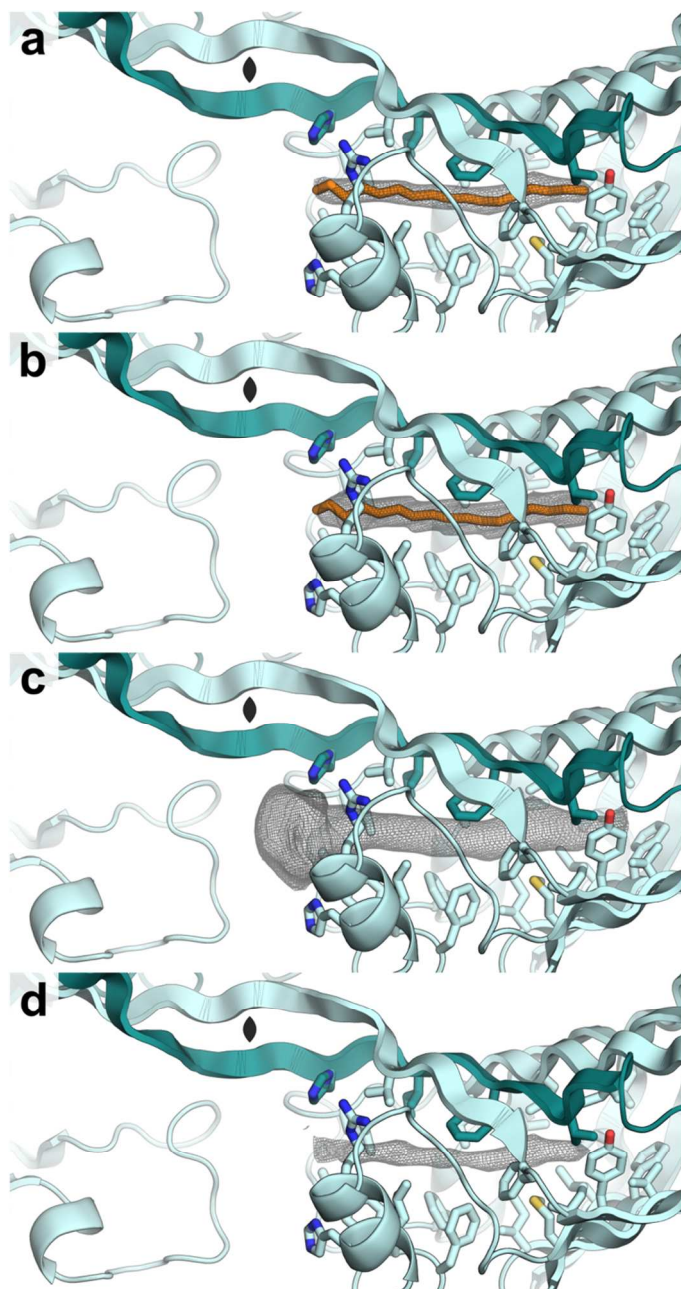

**Figure S18.** Comparison of WT maps at the internal ligand site, including **(a)** the standard  $2mF_o - DF_c$  map (contoured at  $0.8 \sigma$ ), **(b)** the FEM map (contoured at  $1.0$ ), and two different maps generated with all adduct atoms omitted, specifically **(c)** the Polder omit map (contoured at  $3.0 \sigma$ ) and **(d)** a simulated annealing omit map with harmonic restraints (contoured at  $0.8 \sigma$ ). In all cases, the illustrated protein coordinates are the same. In this instance, the  $2mF_o - DF_c$  map lacks interpretable density near the binding site opening. The Polder map provides a better illustration of the likely placement for a negatively charged ligand head group in the vicinity of His39, Arg84, and His87. A 2-fold symmetry axis relating the halves of the domain swapped dimer (light blue and dark blue chains) is indicated with the curved diamond shape (black).

### Set of Surface Residues for Bfactor Comparision

|       |       |        |        |
|-------|-------|--------|--------|
| MET21 | VAL55 | THR103 | ASN156 |
| LYS22 | ASP57 | THR105 | LYS158 |
| GLU23 | ASP59 | LYS107 | LYS160 |
| THR25 | SER62 | LYS108 | SER162 |
| ASP27 | GLU64 | LYS116 | ASP163 |
| LYS28 | LYS66 | THR120 | LYS165 |
| ALA29 | LYS67 | THR122 | THR168 |
| HIS30 | ASP69 | THR124 | THR172 |
| ASP32 | THR71 | SER129 | ASP178 |
| GLY34 | LYS73 | LYS130 | ASN180 |
| LYS36 | ASN78 | ASP131 | ASN182 |
| LYS38 | GLU80 | ASP135 | GLU184 |
| GLN41 | ASN81 | GLU137 | GLU186 |
| SER43 | GLN82 | ALA142 | ASN188 |
| ASN44 | THR83 | LYS143 | GLU189 |
| LYS46 | ASN86 | LYS145 | LYS190 |
| ASN48 | GLN90 | ASP146 | GLU191 |
| LYS50 | ASP91 | LYS148 |        |
| ASP51 | ASP92 | LYS150 |        |
| SER53 | LYS97 | SER154 |        |

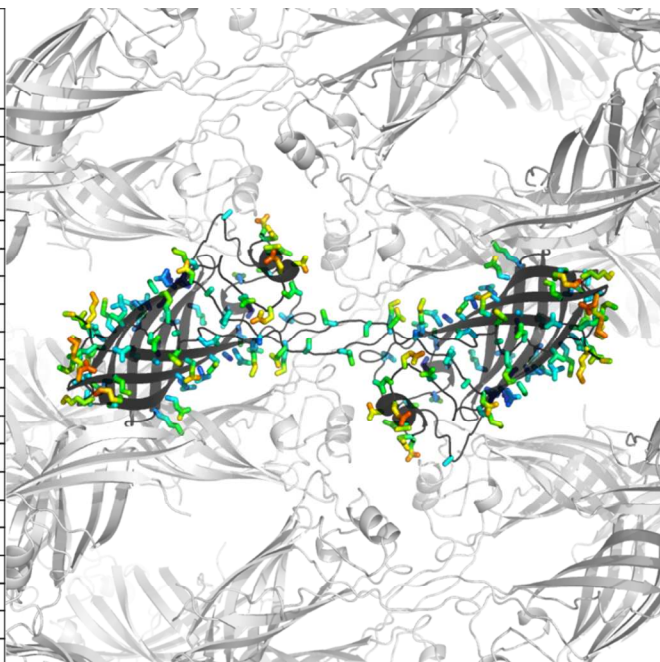

**Figure S19.** A set of solvent exposed surface residues was manually identified for B-factor comparison to installed guest molecules. A representative image of the selected residues is displayed with B-factor weighted coloring (blue coloring represents relative low B-factor and red coloring represents relative high B-factor).

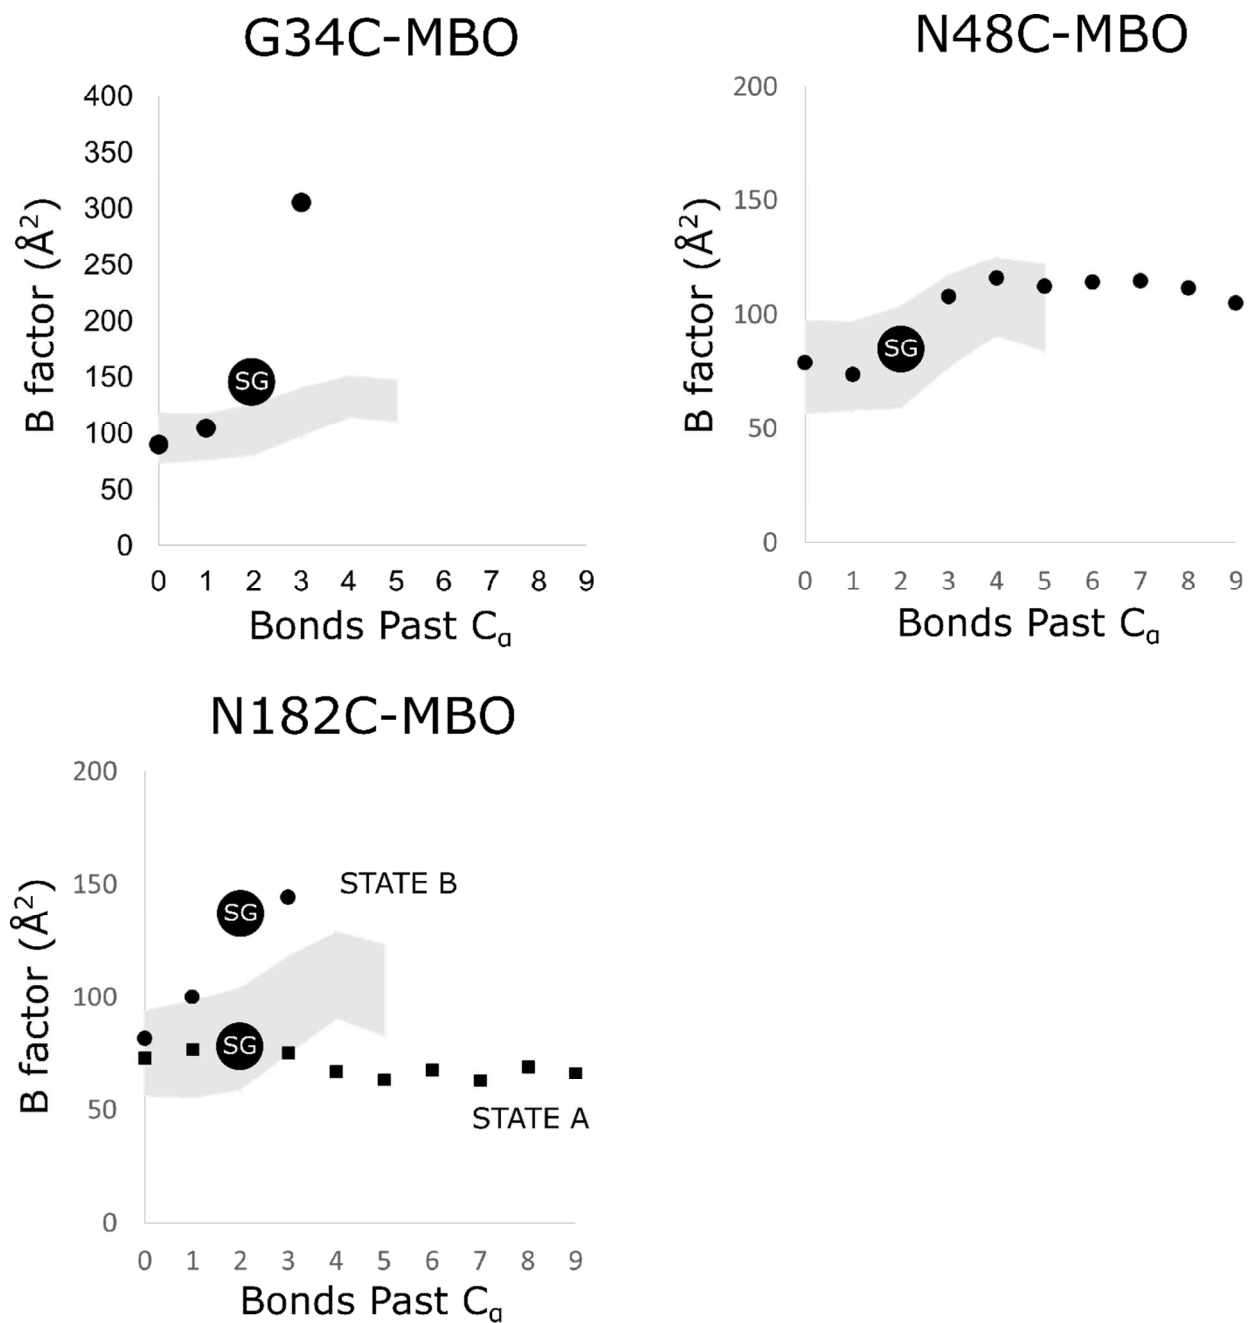

**Figure S20.** To examine the flexibility of MBO conjugation products, the average B-factor at the attachment site was plotted as a function of bond count from the alpha-carbon (dark circles). The attachment atom is clearly marked (SG). For reference, the mean B-factor (+/- one standard deviation) for a set of solvent exposed amino acid residues (Figure S19) is illustrated (filled light grey).

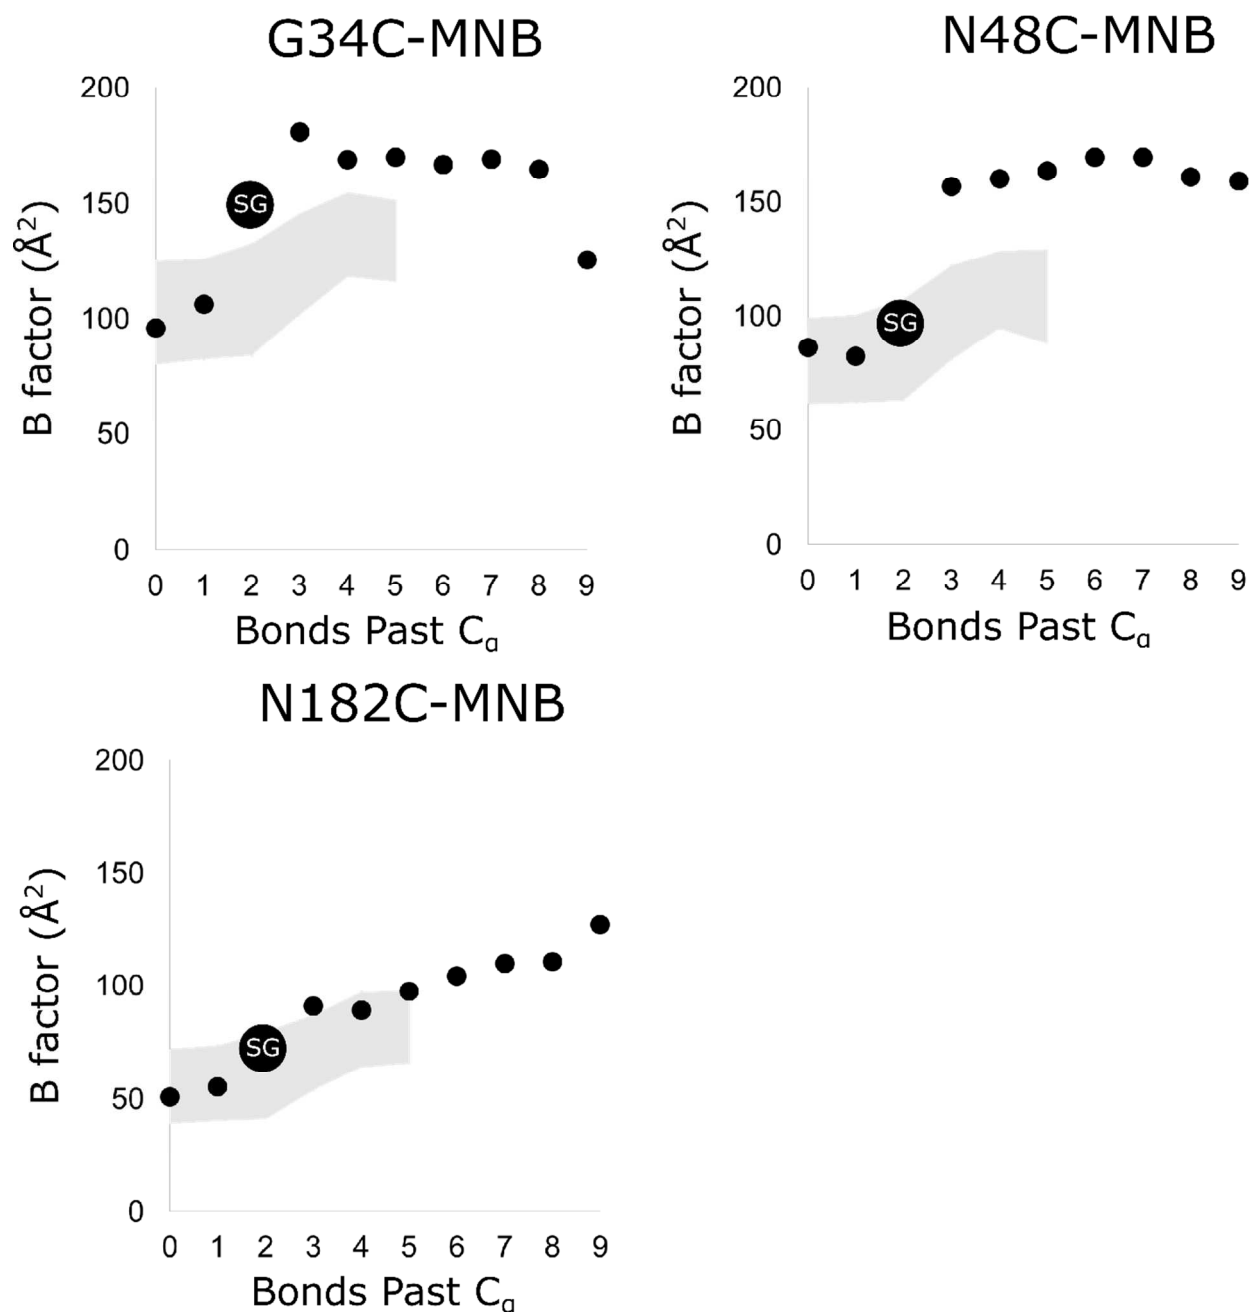

**Figure S21.** To examine the flexibility of MNB conjugation products the average B-factor at the attachment site was plotted as a function of bond count from the alpha-carbon (dark circles). The attachment atom is clearly marked (SG). For reference, the mean B-factor (+/- one standard deviation) for a set of solvent exposed amino acid residues (Figure S19) is illustrated (filled light grey).

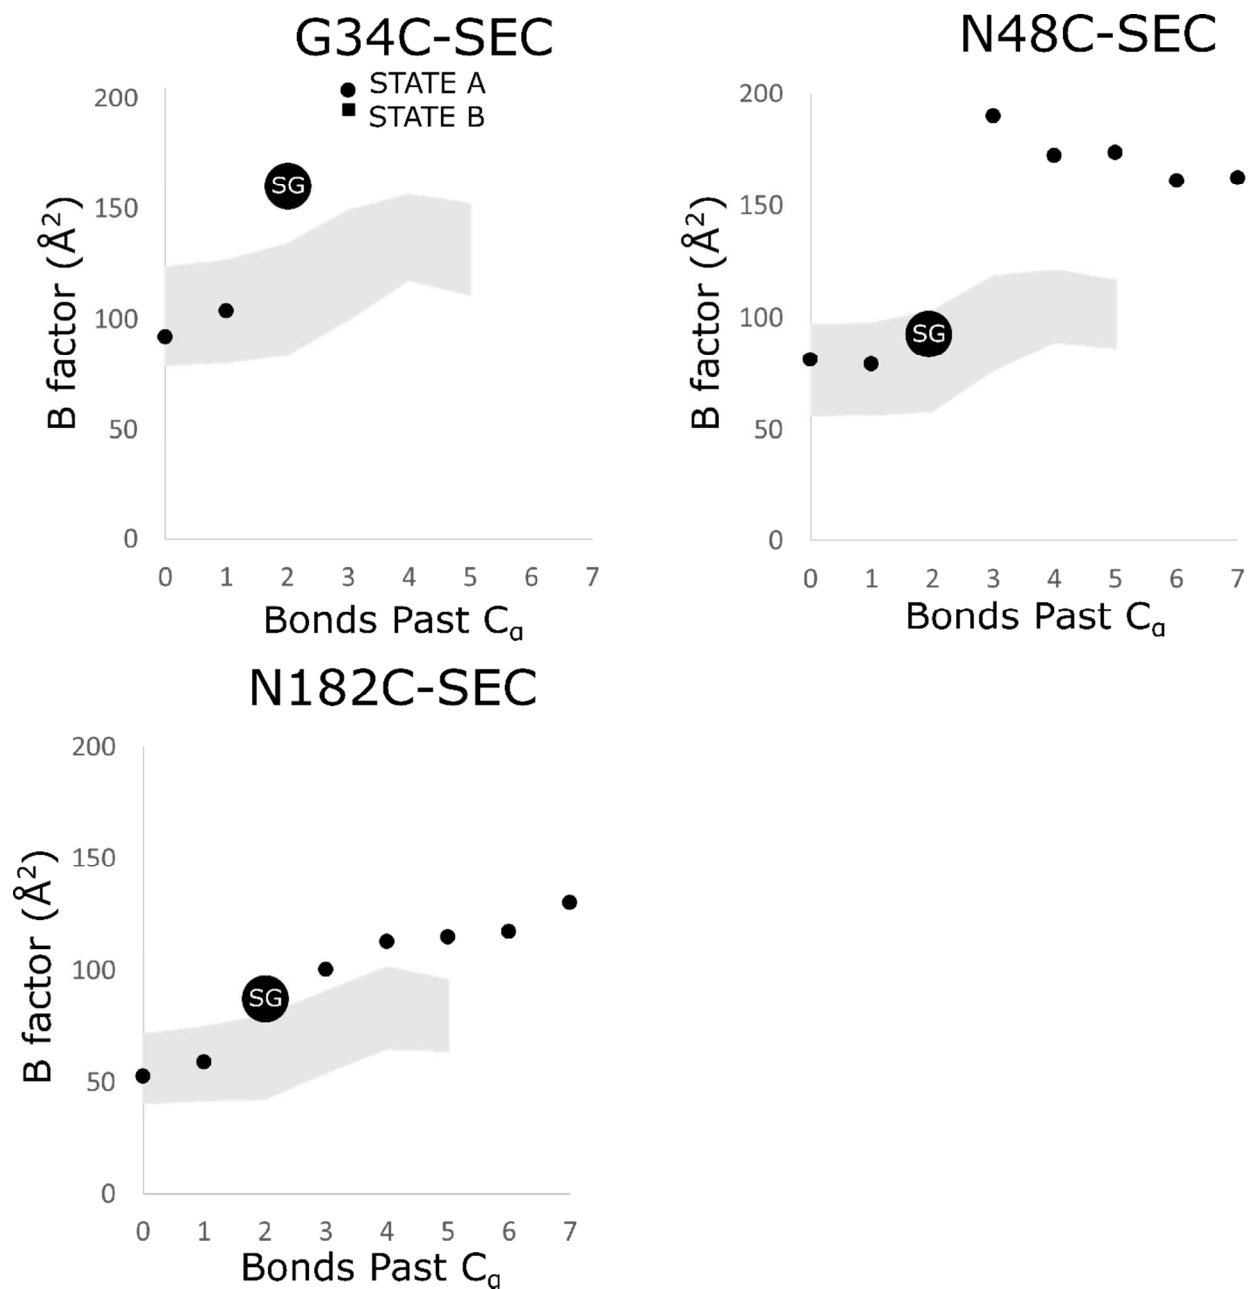

**Figure S22.** To examine the flexibility of SEC conjugation products, the average B-factor at the attachment site was plotted as a function of bond count from the alpha-carbon (dark circles). The attachment atom is clearly marked (SG). For reference, the mean B-factor (+/- one standard deviation) for a set of solvent exposed amino acid residues (Figure S19) is illustrated (filled light grey).

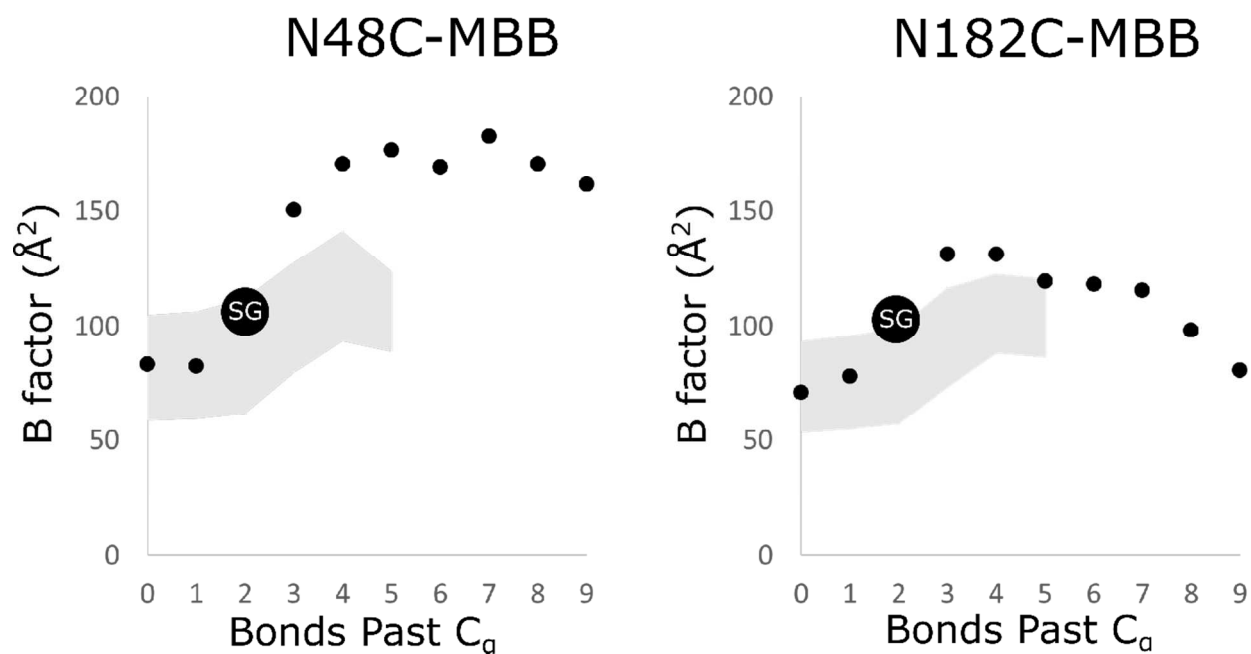

**Figure S23.** To examine the flexibility of MBB conjugation products, the average B-factor at the attachment site was plotted as a function of bond count from the alpha-carbon (dark circles). The attachment atom is clearly marked (SG). For reference, the mean B-factor (+/- one standard deviation) for a set of solvent exposed amino acid residues (Figure S19) is illustrated (filled light grey).

## References

- (1) Afonine, P. V., Moriarty, N. W., Mustyakimov, M., Sobolev, O. V., Terwilliger, T. C., Turk, D., Urzhumtsev, A., and Adams, P. D. (2015) FEM: feature-enhanced map. *Acta Crystallogr. D Biol. Crystallogr.* **71**, 646–666.
- (2) Liebschner, D., Afonine, P. V., Moriarty, N. W., Poon, B. K., Sobolev, O. V., Terwilliger, T. C., and Adams, P. D. (2017) Polder maps: improving OMIT maps by excluding bulk solvent. *Acta Crystallogr. Sect. Struct. Biol.* **73**, 148–157.
- (3) Hodel, A., Kim, S.-H., and Brünger, A. T. (1992) Model bias in macromolecular crystal structures. *Acta Crystallogr. A* **48**, 851–858.
- (4) Evans, P. R., and Murshudov, G. N. (2013) How good are my data and what is the resolution? *Acta Crystallogr. D Biol. Crystallogr.* **69**, 1204–1214.
- (5) Karplus, P. A., and Diederichs, K. (2012) Linking crystallographic model and data quality. *Science* **336**, 1030–1033.
- (6) Diederichs, K., and Karplus, P. A. (2013) Better models by discarding data? *Acta Crystallogr. D Biol. Crystallogr.* **69**, 1215–1222.
- (7) Strong, M., Sawaya, M. R., Wang, S., Phillips, M., Cascio, D., and Eisenberg, D. (2006) Toward the structural genomics of complexes: Crystal structure of a PE/PPE protein complex from *Mycobacterium tuberculosis*. *Proc. Natl. Acad. Sci.* **103**, 8060–8065.
